1  
2  
3  
4  
5  
6  
7

---

This manuscript is in preparation for submission to a peer reviewed journal. Please note that this manuscript has not yet formally undergone peer review. Subsequent versions of this manuscript may have slightly different content. If accepted, the final version of this manuscript will be available. Please feel free to contact any of the authors; we welcome feedback.

---

8 Identifying drivers of sewage-associated pollutants in pollinators across urban landscapes

9

10 Michael F. Meyer<sup>1,4\*</sup>, Matthew R. Brousil<sup>2,5,9</sup>, Benjamin W. Lee<sup>3,6</sup>, Madison L. Armstrong<sup>3,7</sup>,  
11 Elias H. Bloom<sup>3,8</sup>, David W. Crowder<sup>3</sup>

12

13 <sup>1</sup> School of the Environment, Washington State University, Pullman, Washington, United States  
14 99164

15 <sup>2</sup> Center for Environmental Research, Education, & Outreach, Washington State University,  
16 Pullman, Washington, United States 99164

17 <sup>3</sup> Department of Entomology, Washington State University, Pullman, Washington, United States  
18 99164

19 <sup>4</sup> Current Address: U.S. Geological Survey, Observing Systems Division, Madison, Wisconsin,  
20 United States 53726

21 <sup>5</sup> Department of Entomology, Washington State University, Pullman, Washington, United States  
22 99164

23 <sup>6</sup> Current Address: Department of Entomology and Nematology, University of California, Davis,  
24 California, United States 95616

25 <sup>7</sup> Current Address: Center for Population Biology, University of California, Davis, California,  
26 United States 95616

27 <sup>8</sup> Current Address: Department of Plant Pathology and Plant-Microbe Biology, Cornell  
28 University, Ithaca, New York, United States 14850

29 <sup>9</sup> Current Address: Department of Ecosystem Science and Sustainability, Colorado State  
30 University, Fort Collins, CO, United States of America

31

32 \*Corresponding Author: [mfmeyer@usgs.gov](mailto:mfmeyer@usgs.gov)

33

34 **ABSTRACT:** Human sewage can introduce pollutants into food webs and threaten ecosystem  
35 integrity. Among the many sewage-associated pollutants, pharmaceuticals and personal care  
36 products (PPCPs) are useful indicators of sewage in ecosystems and can also cause potent  
37 ecological consequences even at minute concentrations (e.g., ng/L). Despite increased study over  
38 the past three decades, PPCPs in terrestrial systems have been less studied than those in aquatic  
39 ecosystems. To evaluate PPCP prevalence and drivers in a terrestrial ecosystem, we analyzed  
40 managed and native bees collected from agroecosystems in Washington State (USA) for PPCPs.  
41 Caffeine, paraxanthine, cotinine, and acetaminophen were detected in all three evaluated taxa  
42 (*Bombus vosnesenskii*, *Agapostemon texanus*, and *Apis mellifera*), with *B. vosnesenskii* and *A.*  
43 *texanus* having a higher probability of PPCP detection relative to *A. mellifera*. The probability  
44 for PPCP presence in all three taxa increased in landscapes with more human development or  
45 greater plant abundance, with significant but negative interactions among these factors. These  
46 results suggest that human activity, availability of resources, and species-specific traits affect the  
47 introduction and mobilization of PPCPs in terrestrial ecosystems. Consequently, monitoring  
48 PPCPs and their ecological responses in terrestrial ecosystems creates opportunities to synthesize  
49 consequences of sewage pollution across terrestrial and aquatic ecosystems and organism types.

50

51 **KEYWORDS:** Arthropoda, emerging contaminants, entomology, natural history, Persistent  
52 Organic Pollutants

53

54

## 55 INTRODUCTION

56 The introduction of wastewater and its byproducts into ecosystems can mobilize pollutants that  
57 reshape communities and food webs (Edmondson 1970). Historically, research on wastewater  
58 pollution has largely focused on changes in effluent nutrient concentrations as well as chemical  
59 and biological oxygen demand (Edmondson 1970; Brydon and Frodsham 2001; Tong et al.  
60 2020). Recently, research emphasis has broadened to include micropollutants that are often  
61 found in sewage (Bernhardt et al. 2017). Pharmaceuticals and personal care products (PPCPs) in  
62 particular have garnered increased attention as an emerging organic micropollutant because they  
63 are consistently associated with human sewage and pose potent, yet often uncertain, ecological  
64 consequences (Richmond et al. 2017; Meyer et al. 2019).

65 As PPCPs are consistently associated with sewage, their presence, even at minute  
66 concentrations (e.g., ng/L), can indicate wastewater inputs into an ecosystem. Previous  
67 continental and worldwide surveys show that PPCPs such as antibiotics, non-prescription and  
68 prescription drugs, hormones, and fragrances are pervasive within subsurface and surface  
69 systems (Kolpin et al. 2002; Focazio et al. 2008; Wilkinson et al. 2022). Once introduced into  
70 ecosystems, PPCPs can propagate through food webs, where they can be metabolized (del Rey et  
71 al. 2011), accumulate within organisms (Meador et al. 2016), and be transferred across trophic  
72 levels (Richmond et al. 2018). However, patterns of PPCP prevalence across taxa can be related  
73 to individual behavior and tissue allocation (Meador et al. 2016), and biological responses to  
74 PPCPs are often uncertain and context-dependent. For example, activity and feeding rates of  
75 individual fish (*Perca fluviatilis*; European perch) increased when they were exposed to the anti-  
76 anxiolytic drug oxazepam, but sociality of fish populations decreased (Brodin et al. 2013).  
77 Certain algal taxa have been shown to have reduced photosynthesis and increased 16-carbon

78 unsaturated fatty acid production when exposed to fluoxetine, even though essential fatty acid  
79 synthesis was not affected (Feijão et al. 2020). Bumble bees fed nectar primed with caffeine have  
80 shown increased foraging behavior on nectars with similar aromatic compounds (Wright et al.  
81 2013; Arnold et al. 2021). Overall, the literature suggests that biological responses to PPCPs are  
82 common and often deleterious, although specific responses may also be uncertain (Richmond et  
83 al. 2017).

84       Although considerable evidence from aquatic systems suggests that PPCPs are ubiquitous  
85 and disrupt ecological processes, comparatively few studies on PPCPs have been conducted in  
86 terrestrial systems (Meyer et al. 2019). This imbalance in the literature creates opportunity to  
87 assess how PPCPs may propagate through terrestrial food webs in comparison to aquatic food  
88 webs. For example, bees are exclusively terrestrial insect taxa that provide pollination services in  
89 natural and managed ecosystems (Kleijn et al. 2015). As has been observed in earthworms  
90 (Carter et al. 2021), bee pollinators may be commonly exposed to PPCPs through soil contact,  
91 interactions with plants, applications of biosolids for fertilizer, or through contamination of water  
92 in terrestrial ecosystems. Due to the dramatic, recent declines in bee pollinators within terrestrial  
93 food webs worldwide (Potts et al. 2010; Kleijn et al. 2015), bee taxa may be promising,  
94 societally important model organisms for expanding PPCP research from aquatic to terrestrial  
95 ecosystems.

96       To assess PPCP prevalence and mobilization in pollinators within exclusively terrestrial  
97 food webs, we evaluated the presence and drivers of PPCPs in three bee species: *Bombus*  
98 *vosnesenskii*, *Agapostemon texanus*, and *Apis mellifera*. Two of these species are wild (*B.*  
99 *vosnesenskii*, *A. texanus*), but *A. mellifera* (honey bee) is managed by humans. Our first goal was  
100 to identify species-specific patterns of PPCP presence. We predicted that taxa interacting with

101 the soil (ground-nesting bees; i.e., *B. vosnesenskii*, *A. texanus*) would be more frequently  
102 associated with PPCPs than managed, colony-forming species (i.e., *A. mellifera*), as ground-  
103 nesting taxa would more likely encounter PPCPs within groundwater and biosolids, similar to  
104 interactions observed in earthworms (Carter et al. 2021). Our second goal was to assess the  
105 potential drivers of PPCP presence in each bee taxa. We predicted that PPCP presence would  
106 increase at sites with greater human development and with a higher density of floral plant  
107 resources at the sampling location, both of which can be potentially concentrated sources of  
108 PPCPs (Carter et al. 2021; Meyer et al. 2022). Overall, our study provides some of the first  
109 evidence for PPCP uptake in exclusively terrestrial bee species, while also demonstrating that  
110 both landscape-context and organismal traits may affect exposure to and uptake of PPCPs.

111

## 112 MATERIALS AND METHODS

113 **Study System.** Our study of PPCPs in bees was nested within a study of bee ecology on 36  
114 small (< 25 ha), diversified farms and community gardens (e.g., farms and gardens with more  
115 than five unique flowering crops in simultaneous production) in western Washington (USA)  
116 (Bloom et al. 2021). For the present study, bees were collected from a subset of 10 urban gardens  
117 that were selected along an urbanization gradient (Fig. 1). Each garden was at least 1 km apart  
118 for spatial independence (Bloom et al. 2021; Desaegher et al. 2022).

119

120 **Bee and plant surveys.** Bees were collected at each site using three blue vane traps  
121 (SpringStar LLC, Woodinville, WA, USA) and 15 bee bowls placed along a 50 m transect. All  
122 collected bees were preserved, pinned, and then identified to species (Bloom et al. 2021). Of the  
123 6,539 specimens collected, we selected 101 specimens with approximately balanced specimens

124 from each of the three bee species (*B. vosnesenskii*, *A. texanus*, and *A. mellifera*); these taxa  
125 reflect variation in social behavior (social vs. solitary taxa) and nesting strategies (i.e., cavity vs.  
126 ground-nesting taxa). Because bee species were collected across three years (2014, 2015, 2016)  
127 and three time points (spring, summer, and fall), we selected pinned specimens for this analysis  
128 to have a balanced number of individuals across the sampling period. Specimen selection was  
129 stratified by species, year, early/mid/late-summer timing, and sampling location, where each  
130 species-timing-year-site combination included at least two individuals. As each species-timing-  
131 year-site combination contained numerous individuals from the original sampling events,  
132 personnel haphazardly selected individuals within a species-timing-site-year stratum.

133 To assess the role of plant communities in affecting PPCP presence in bees, plant richness  
134 and abundance were measured at sites on the same date as bee sampling. Plants with flowers  
135 serving as resources for bee visitation (i.e., having pollen and nectar) were recorded along the  
136 same transect used for bee collection. A portable 1 × 1 m plot was placed over vegetation at 5 m  
137 intervals and all plants with open flowers were identified to species. Each transect moved in a  
138 serpentine fashion across each study site. Summarized field variables are detailed in Table S1.

139

140 **Landscape context.** As sites were located along an urbanization gradient, we determined  
141 the amount of developed landscape within 1 km of each site using the United States Department  
142 of Agriculture cropland data layer (CDL). Proportion development was defined as the count of  
143 developed pixels within 1 km of each site divided by the total number of all pixels. Each pixel  
144 within the CDL classifies a 30 × 30 m area as a landscape class, with 255 possible  
145 classifications. To characterize all human development within a landscape, we summed across  
146 low, moderate, and high intensity pixels (Table S1) (Han et al. 2014).

147

148       **PPCP extraction and quantification.** Each dried bee sample was massed and then ground  
149 with mortar/pestle. Bee PPCPs were extracted using a three-phase sequential extraction, similar  
150 to those described previously in Brodin et al. (2013) and Furlong et al. (2008). First, 1.5 mL of  
151 methanol/water mix (7:3 ratio) with 0.1% formic acid was added into the mortar with the bee  
152 parts and poured into a glass culture tube. An additional 1.5 mL methanol/water mix with 0.1%  
153 formic acid was used to rinse the mortar and pestle, and then was poured into the same centrifuge  
154 tube. Tubes with tissue and extract were centrifuged at 2,000 rpm for 5 minutes. Following  
155 centrifugation, supernatant was then added to a clean centrifuge tube, and then immediately  
156 wrapped in parafilm. A second 1.5 mL acetonitrile was next added to the first tube containing the  
157 bee tissue. The tube containing bee tissue was then vortexed and centrifuged twice. After each of  
158 the three extraction phases, the sample was placed under nitrogen flow in a 40°C bath. Once  
159 samples were nearly evaporated completely, 1mL of formate buffer was added to each sample,  
160 and the concentrated extract was transferred to a 1.5 mL amber glass autosampler vial. Samples  
161 were preserved in the dark at -20°C until being analyzed with HPLC/MS.

162

163       **HPLC/MS Quantification.** PPCP identification and enumeration followed methods  
164 similar to Furlong et al (2008) and Brodin et al. (2013). Standards for each PPCP are described  
165 in table SM1. HPLC eluents included a 10-mM formate buffer and 100% acetonitrile solution  
166 that varied in percent contribution over the quantification procedure (Table SM1). Minimal  
167 detection limits were estimated to be 5 ng/g. A main difference between our methods and others  
168 prior is that we split analyte signatures into separate channels, so as to avoid peak interference



169 (described in Table SM1). Mass spectrometer time-programmed operating conditions for  
170 individual compounds are detailed in Table SM2-3.

171 Samples were also analyzed in a manner to account for potential cross-sample  
172 contamination and peak drift. Following standard samples, 2 blanks of 100% methanol were  
173 processed and assessed for contamination. Following the two blank samples, bee samples were  
174 processed in batches of 10 followed by 1 blank, 1 standard (100 ng/L), and 1 blank. This routine  
175 allowed us to purge the column from potential cross-sample contamination, to assess if samples  
176 were contaminating downstream samples within a batch, and to control for peak drift.

177 Following peak quantification, we noticed that concentrations tended to be bimodal,  
178 where PPCPs were either detected in higher concentrations or not detected (Figure 2). We  
179 assumed that the bimodality of these detections was likely a product of low-to-intermediate  
180 PPCP concentrations degrading since the time of specimen collection or diffusing from bee  
181 tissues as samples were originally collected in an ethanol solution before pinning (Bloom et al.,  
182 2021). In order to provide conservative estimates of bee PPCP presence, we reduced  
183 concentrations into categorical presence/absence informatics, such that subsequent models and  
184 model interpretations should be conservative.

185

186 **Quality Assurance and Quality Control Procedures.** During PPCP extraction and  
187 quantification, an internal standard was unintentionally not included within each sample. To  
188 account for potential biases and contamination that might arise during the PPCP extraction and  
189 quantification process, we developed quality assurance and quality control protocols to ensure  
190 high confidence of model results.

191 Throughout the entirety of the sampling process, laboratory personnel refrained from  
192 consuming caffeinated beverages, nicotine products, and non-prescription medications.  
193 Personnel wore an N95 mask and nitrile gloves during extraction to reduce chance of  
194 contamination during extraction.

195 Samples were double-blind throughout the entire specimen selection, PPCP extraction,  
196 peak quantification, and modeling procedures. Personnel extracting PPCPs from bees were only  
197 aware of “Sample ID” for each specimen, which was written on the autosampler vial.  
198 Experimental autosampler vials were haphazardly placed in the auto-sampler to reduce  
199 likelihood of biases due to order in the auto-sampler. A separate laboratory personnel analyzed  
200 ion spectra. Throughout the entire spectra analysis, the technician only knew the “Sample ID”  
201 and not any metadata associated with that “Sample ID”. Lastly, a third person modeled the data  
202 from HPLC/MS quantification. Through each step, experimental personnel only knew samples  
203 by a unique “Sample ID” and were not aware of any attributes associated with that sample.  
204 Together, this scheme was intentionally designed to potentially eliminate personnel-specific  
205 biases throughout the extraction and analysis process.

206

207 **Modeling PPCP presence.** We iterated through all combinations of logistic regression  
208 models to predict PPCP presence based on six predictor variables: bee and plant abundance, bee  
209 and plant diversity, percent development, bee taxon, and all two-way interactions between these  
210 variables (Katz et al. 2015; Rheubert et al. 2020). To account for edge effects, all variables were  
211 standardized by the perimeter:area ratio of their respective site. Once all models were generated,  
212 we selected the best model based on AICc,  $R^2$ , AUC, accuracy (percent true results), and p-  
213 value. When multiple models had similar performance (AICc within two points of lowest AICc

214 value and  $R^2$ , AUC, and accuracy above the median of all models), best performing models were  
215 averaged to create a single statistical model. To validate our results, we repeated analyses 1,000  
216 times with 80:20 train:test subsetted data, and compared the distribution of model parameters and  
217 pseudo- $R^2$  values from subsetted data to those models generated with the entire dataset. This  
218 subsetting routine allowed us to assess whether the distribution of possible model parameters  
219 was multi-modal and to evaluate whether the model constructed with 100% of the training data  
220 was overfit to those data (Rheubert et al. 2020).

221 All analyses were conducted within the R Statistical Environment (R Core Team 2022)  
222 using the packages `glmulti` (Calcagno 2019), `tidyverse` (Wickham et al. 2019), `janitor` (Firke  
223 2020), `MuMIn` (Barton 2020), `ggpubr` (Kassambara 2019), `ggeffects` (Lüdecke 2018), `lubridate`  
224 (`Grolemund` and Wickham 2011), `plotrix` (Lemon 2006), `Hmisc` (Jr et al. 2020), `corrplot` (Wei  
225 and Simko 2017), `ggrepel` (Slowikowski 2019), `ggspatial` (Dunnington 2021), `tigris` (Walker  
226 2021), `cowplot` (Wilke 2019), `sf` (Pebesma 2018), and `readxl` (Wickham and Bryan 2019).

## 227 RESULTS

228 **Species-specific PPCP detections.** We detected four PPCPs across all three bee species:  
229 caffeine, paraxanthine/1,7-dimethylxanthine, acetaminophen/paracetamol, and cotinine. We did  
230 not detect evidence of seven other PPCPs: codeine, warfarin, trimethoprim, sulfamethoxazole,  
231 diphenhydramine, thiabendazole, or albuterol. *Bombus vosnesenskii* (50% of samples; Table S2)  
232 and *A. texanus* (44%; Table S2) tended to have a higher odds ratio of PPCP presence relative to  
233 *A. mellifera* (26%; Table S2).

234

235 **Relating PPCP presence with human development and plant abundance.** Across all  
236 bee taxa, the probability of PPCP presence increased in landscapes with greater human

237 development or higher plant abundance (Fig. 2). However, there was a significant negative  
238 interaction between human development and plant abundance, suggesting the positive  
239 association between development and PPCP presence decreased in landscapes with greater plant  
240 abundance; and, the positive effects of plant abundance on PPCP presence decreased in  
241 landscapes with greater development (Fig. 2, Fig. S1).

242 Our subsetting routine, which assessed the probability of observing the final model solely  
243 by chance, suggested our final model coefficients were non-random (Fig. 3). Model parameter  
244 estimates (Figure 3) as well as pseudo- $R^2$  values (Figure 4) were generally unimodal. Most  
245 subsetted model runs included human development and plant abundance as positive predictors of  
246 PPCP presence (Figure 3), and most coefficients for interactions between plant abundance and  
247 development were negative (Figure 3). Coefficients from the subsetting routine also  
248 corresponded with patterns of PPCP detections for each taxon, where *B. vosnesenskii* had higher  
249 positive coefficients, and *A. mellifera* and *A. texanus* tended to have lower negative coefficients  
250 (Figure 3).

251

## 252 **DISCUSSION**

253 Our study demonstrates the presence of PPCPs in a terrestrial ecosystem and highlights that  
254 pinned insect specimens can be used along with environmental data to understand patterns of  
255 PPCP prevalence. These results are notable, considering that the study of PPCPs in terrestrial  
256 ecosystems is uncommon relative to aquatic environments (Meyer et al. 2019). Our results  
257 corroborate those results from aquatic systems, showing that PPCP presence can be influenced  
258 by human development and species-specific traits (Bendz et al. 2005; Meador et al. 2016) and

259 that PPCPs can be mobilized in terrestrial food webs (Lagesson et al. 2016; Richmond et al.  
260 2018).

261 Our results suggest PPCPs are more prevalent in *B. vosnesenskii* and *A. texanus* than in *A.*  
262 *mellifera* (Table S2), implying that differences in species' life history can affect PPCP  
263 accumulation. Both *B. vosnesenskii* and *A. texanus* create nests in the soil, which may increase  
264 exposure to human contaminants in the soil matrix and groundwater relative to *A. mellifera*,  
265 which is managed in artificial nests by humans (Gradish et al. 2019). Additionally, *A. mellifera*  
266 may prefer different resources within the same habitat (Thompson and Hunt 1999; Leonhardt  
267 and Blüthgen 2012), generating variation in exposure. Niche partitioning of floral resources due  
268 to differences in traits, such as tongue length, could also mediate pollutant exposure (e.g.,  
269 pesticides) (Brittain and Potts 2011). In addition to pollinator traits, heightened PPCP exposure  
270 for *B. vosnesenskii* and *A. texanus* may be due to variable production practices across sampling  
271 locations, with farmer's application of wastewater byproducts to soil contaminating certain  
272 pollinator nesting sites (Karnjanapiboonwong et al. 2010; Shahriar et al. 2021). While we are not  
273 aware of wastewater byproduct applications at our sampling locations, prevalence of external  
274 pollutants in conventional and organic farms is common (Humann-Guillemint et al. 2019).

275 Beyond species-specific patterns, our results suggest that human development and plant  
276 abundance mediated PPCP presence across all three taxa. This result is consistent with previous  
277 findings in aquatic systems, where the source concentration (e.g., amount of development) and  
278 paths to trophic transfer (e.g., number of plants) are correlated with the presence of PPCPs at  
279 higher trophic levels (Richmond et al. 2018). For example, PPCP concentrations in aquatic  
280 systems have been shown to be directly proportional with human population size and inversely  
281 proportional to distance from a human population center (Bendz et al. 2005; Meyer et al. 2022).

282 PPCPs also can transfer between trophic levels (Richmond et al. 2018), which may lead to non-  
283 linear biological processes and consequences, such as our data showing a negative interaction  
284 between plant abundance and human development. Consequences of PPCPs within food webs  
285 are hard to predict, although they can cause biological responses at physiological (Feijão et al.  
286 2020), behavioral (Brodin et al. 2013), population (Hoppe et al. 2012), community (Lee et al.  
287 2016), and ecosystem (Richmond et al. 2019) levels. Aside from PPCPs eliciting direct  
288 biological responses, PPCPs may co-occur with numerous human disturbances, such as nutrient  
289 pollution, that may further obfuscate clear associations between biological consequences and  
290 PPCP exposure.

291 To our knowledge, this is the first study to detect PPCPs in bee tissues that were preserved  
292 and pinned in a manner similar to museums. While not originally intended for the present study,  
293 detailed field notes and extensive covariate collection created the opportunity for us to evaluate  
294 PPCP presence across taxa while testing potential mechanistic drivers of PPCP presence.  
295 Considering the growing number of pharmaceuticals (Daughton and Ternes 1999) and changes  
296 in pesticides used on national and global markets (Douglas et al. 2020), preserved collections,  
297 such as in natural history museums, may offer ripe and previously untapped opportunities to  
298 explore contaminant accumulation and mixtures within biota. For example, lake sediment cores  
299 have been used to reconstruct interdecadal PPCP contamination loadings (Anger et al. 2013).  
300 Similarly, museum collections may empower reconstructions of exposure, accumulation, and co-  
301 contaminant histories, all of which may be useful for detailing how contaminant loading and  
302 mixtures may change through time.

303

304           **Synthesizing PPCP patterns across ecosystem types.** Over the past three decades, the  
305 study of PPCPs has expanded rapidly, and growing evidence suggests that PPCPs are pervasive  
306 micropollutants across aquatic and terrestrial systems alike. Our results suggest that much like  
307 aquatic systems, PPCPs tend to concentrate closer to their sources and have potential to enter  
308 food webs when vectors for trophic transfer are present. Additionally, our results demonstrate  
309 species-specific differences for PPCP uptake. Similar to patterns observed in PPCP accumulation  
310 in aquatic and riparian systems (Meador et al. 2016; Richmond et al. 2018), *B. vosnesenskii* and  
311 *A. texanus* had higher probabilities of PPCP detections relative to *A. mellifera*, implying that life  
312 histories, behavior, or physiological differences between taxa may play a role in PPCP uptake.

313           Broadly, our results present novel opportunities for assessing PPCP presence throughout  
314 food webs and suggest similarities to how terrestrial and aquatic systems accumulate PPCPs.  
315 Where PPCP data are rarer, pairing human development, environmental, and ecological data may  
316 aid managers in flagging systems that are more associated with PPCPs, and thus susceptible to  
317 declines in ecosystem function and services (e.g., pollination). Regardless of the exact trajectory,  
318 our study lays a foundation for future basic and applied PPCP research and creates a synoptic  
319 view of how organic contaminants may mobilize within aquatic and terrestrial environments.

320

## 321 **ACKNOWLEDGMENTS**

322 We would like to thank S. E. Hampton, E. J. Rosi, and R. Spirits for offering advice on clarity and  
323 presentation in a previous version of this manuscript.

324

## 325 **AUTHOR CONTRIBUTIONS**

326 MFM, MRB, BWL, EHB, and DWC designed the experiment. EHB collected field samples. MFM,  
327 BWL, and MRB developed scripts analyses and data visualization. MFM and MLA extracted PPCPs and  
328 analyzed HPLC/MS outputs. All authors contributed text, edited, and approved the final manuscript.

329

### 330 **FUNDING**

331 Funding was provided to EHB and DWC by NSF GROW (121477-007), USDA ORG (2014-51106-  
332 22096), USDA Predoctoral Fellowship (2017-67011-26025), NSF Graduate Research Fellow (DEG  
333 124006-001), Western SARE (GW15-022), and a grant from James Cook University, Cairns, QLD, AU.

334

### 335 **DATA AVAILABILITY STATEMENT**

336 All data and scripts used to produce these analyses can be found in this project's companion  
337 Open Science Framework repository (Brousil et al. 2022).

338



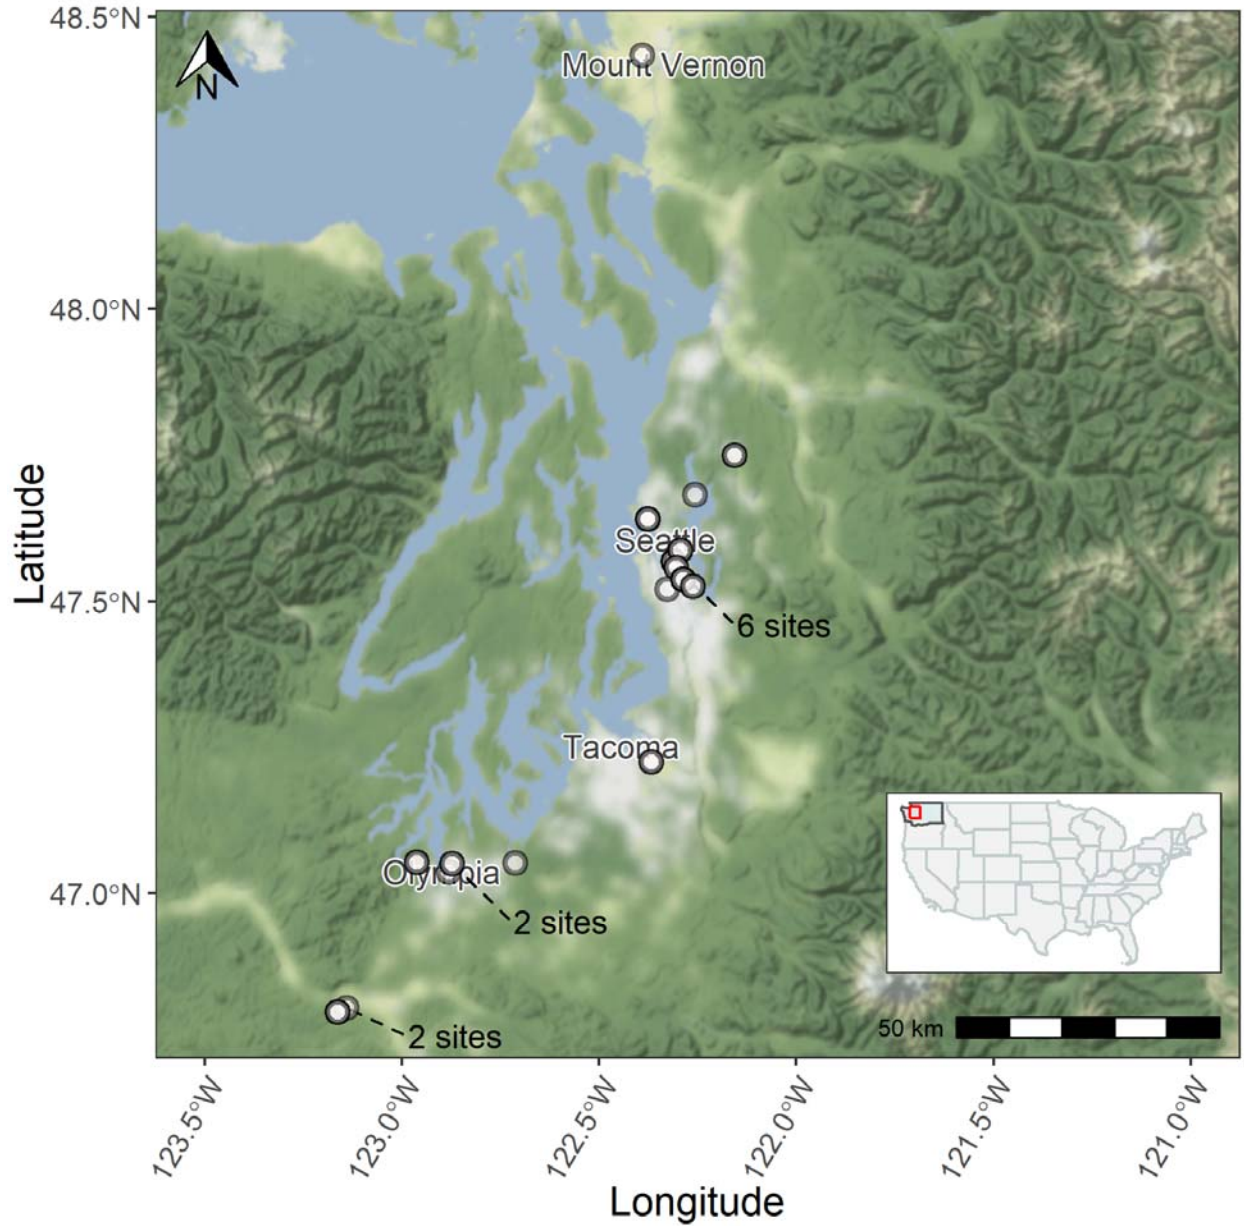

339  
340

341 Figure 1: Map of bee sampling locations (white points). Map tiles by Stamen Design  
342 (stamen.com), under CC BY 3.0 (creativecommons.org/licenses/by/3.0). Data by  
343 OpenStreetMap (openstreetmap.org), under ODbL (openstreetmap.org/copyright). State data  
344 from US Census Bureau 2019.

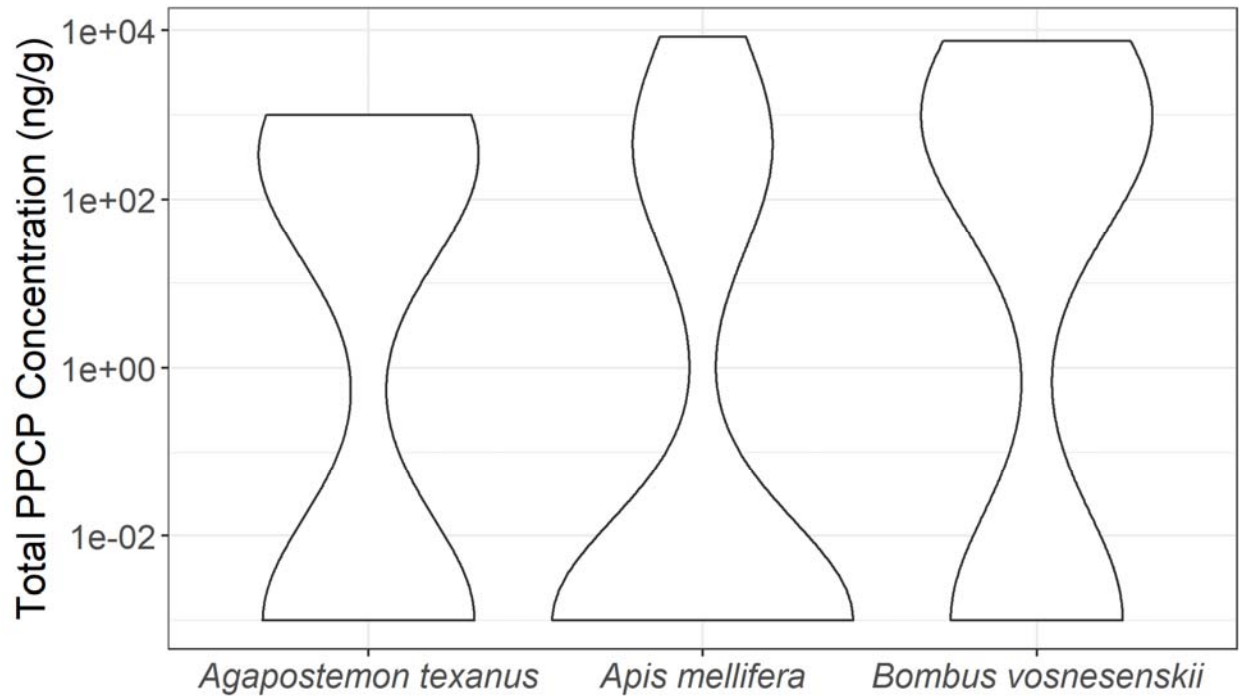

345  
346

347 Figure 2: Violin plot of total PPCP concentrations (on log10 scale) in each of the three examined  
348 bee taxa. Although the figure shows continuous PPCP concentrations, few samples contained  
349 “intermediate” PPCP concentrations, meaning that concentrations were either high (i.e., greater  
350 than 500 ng/g) or not detectable. Given that this framework seemed unrealistic and could be a  
351 product of how bees were preserved, our main analysis only focused on presence/absence of  
352 PPCPs in samples. Therefore, our logistic regression approach should be more conservative than  
353 continuous, linear analyses. Nevertheless, trends in PPCP concentrations mirror patterns  
354 observed in PPCP presence/absence, where *B. vosnesenskii* and *A. texanus* have higher  
355 concentrations and probabilities of PPCP presence relative to *A. mellifera*.

356

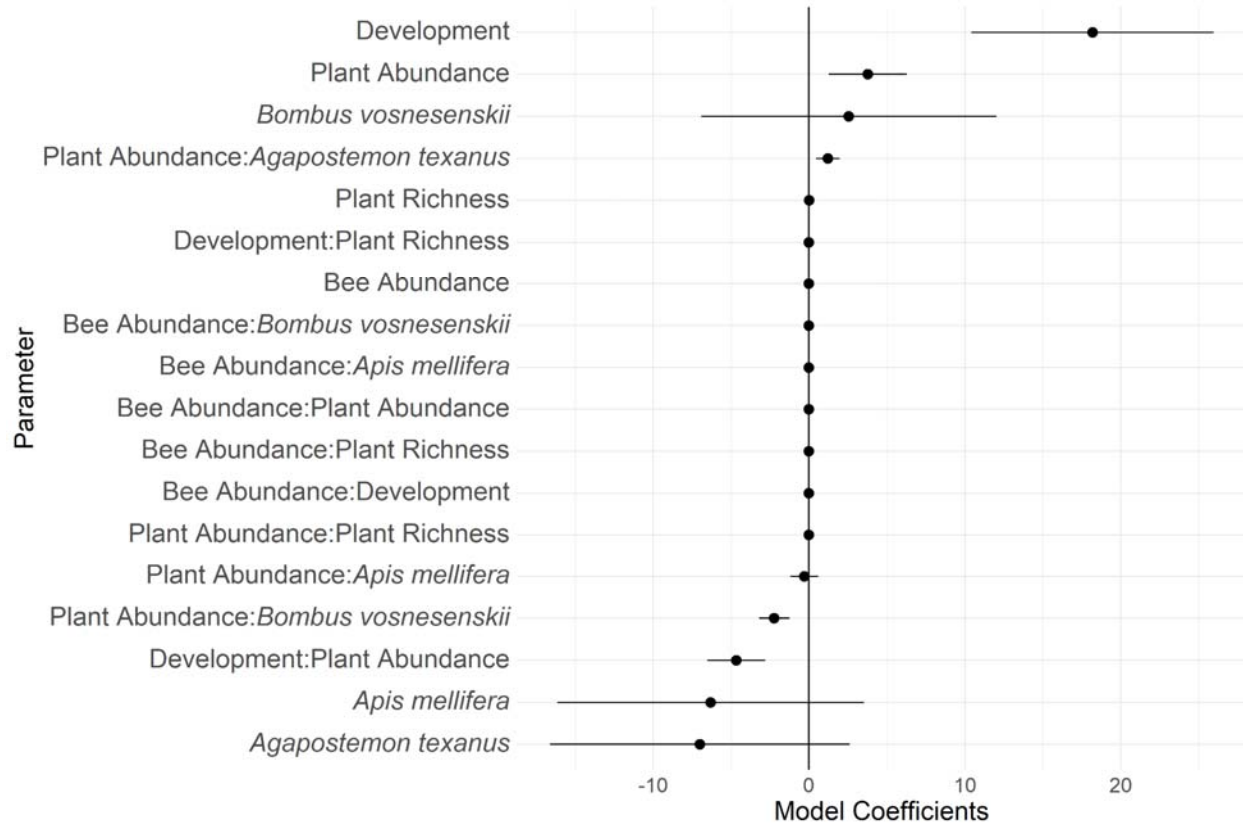

357  
358 Figure 2: Coefficients for the final averaged model using all data for training. Points indicate the  
359 estimated model coefficient, and bars reflect the adjusted standard error. A value of 0 indicates a  
360 variable does not discriminate between PPCP presence or absence. Values greater or less than  
361 zero correspond to predictors that are more or less likely to be associated with PPCP presence,  
362 respectively. Parameters with a colon indicate two-way interaction terms. Parameters are  
363 arranged by decreasing coefficient estimate value.  
364

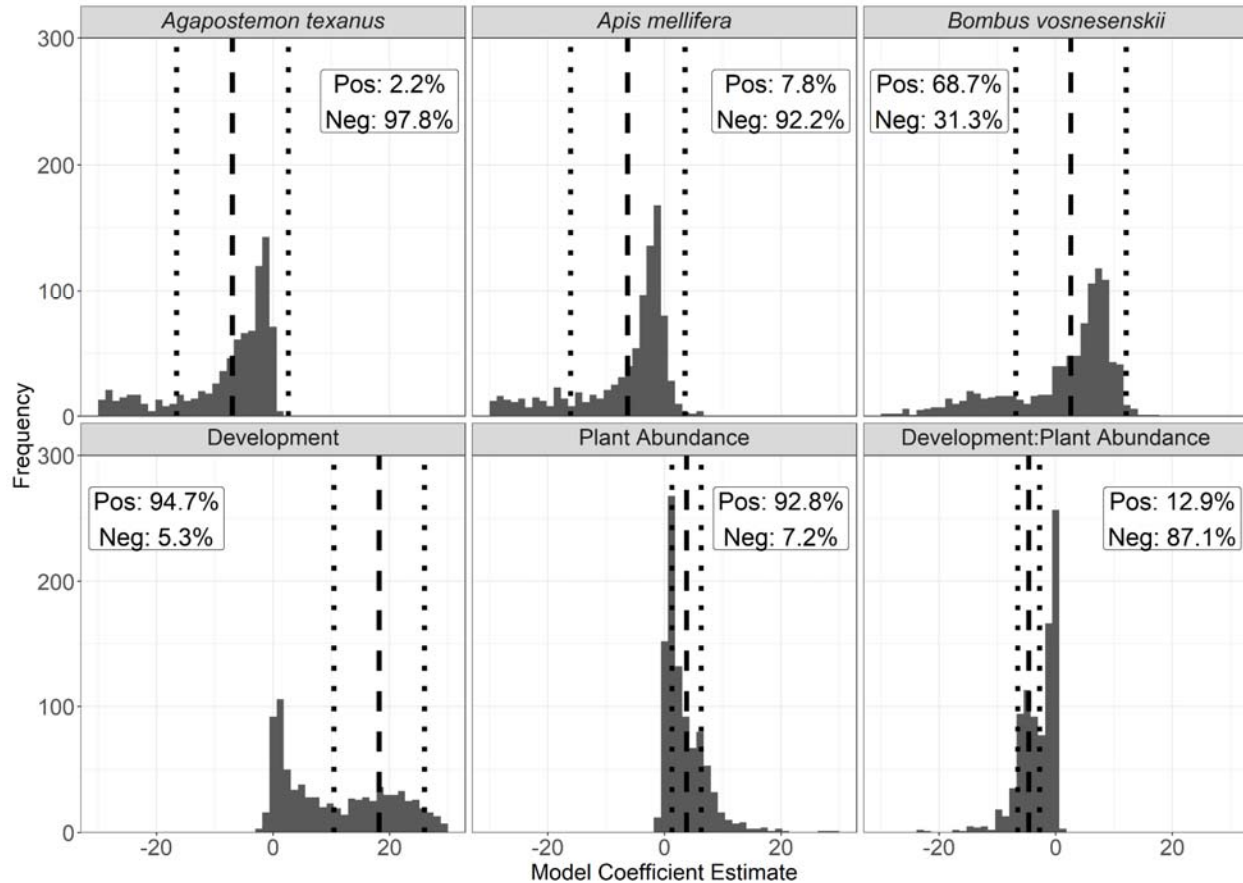

365  
366  
367  
368  
369  
370  
371  
372  
373

Figure 3: Distributions of most influential model coefficients for the final averaged model using 80% of original data as training data. Model averaging protocols were repeated 1,000 times, with each iteration starting with a species-stratified, random subsample. Vertical, dashed lines indicate the coefficient of the parameter that appeared in the final averaged model, when 100% of the data were used. Vertical, dotted lines indicate the adjusted standard error of the coefficient of the parameter that appeared in the final averaged model, when 100% of the data were used. Labels within each facet reflect the percent of coefficients that were positive (i.e., greater than zero) and negative (i.e., less than zero).

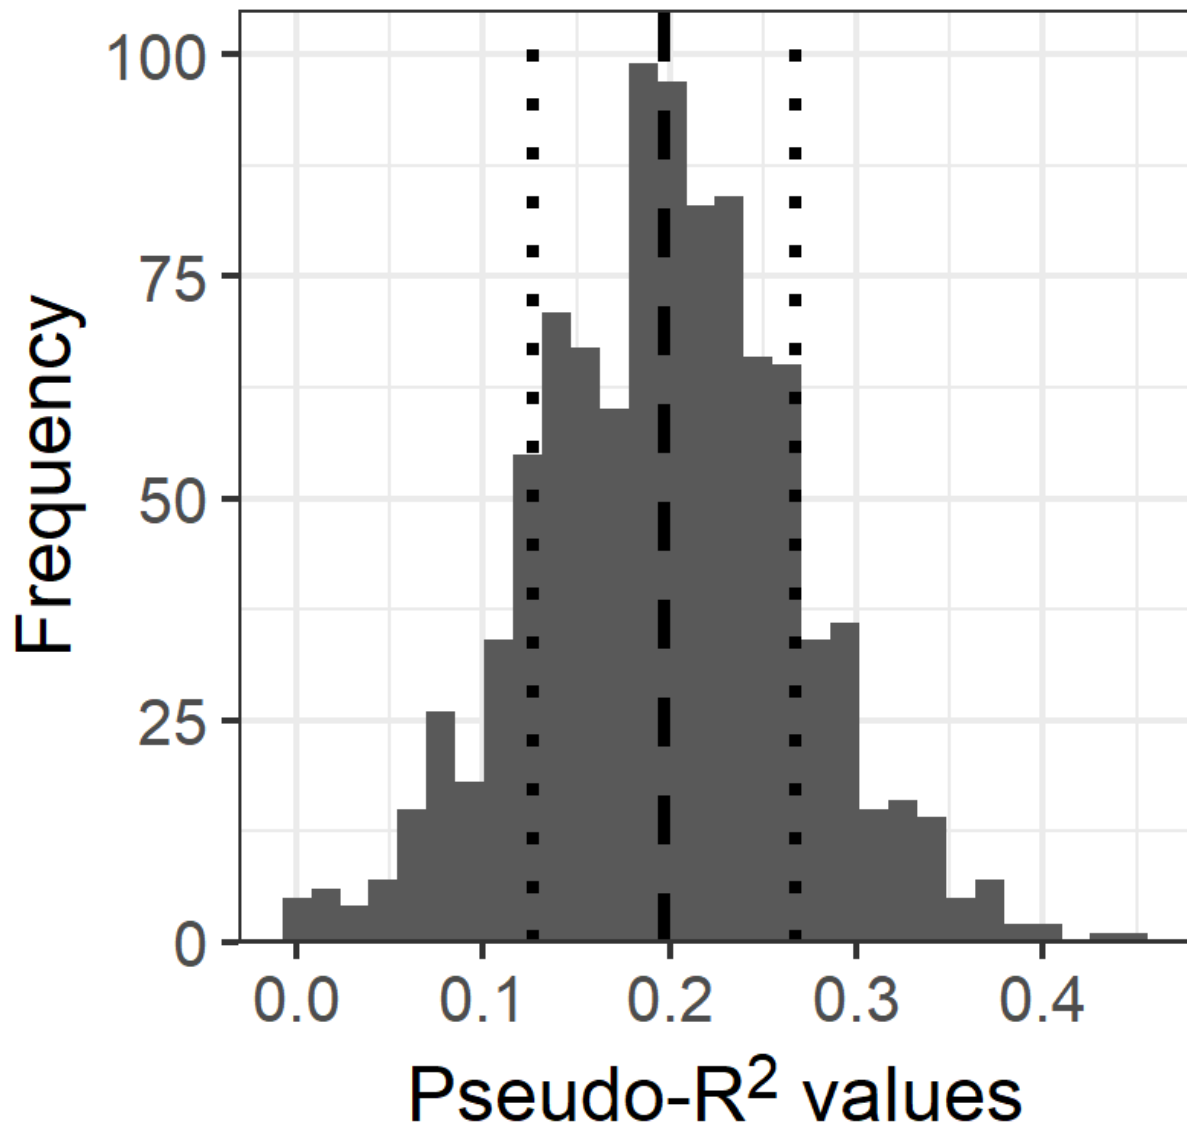

374  
375 Figure 4: Distribution of pseudo R<sup>2</sup> values from all averaged models in the permuted analysis.  
376 The vertical dashed line represents the mean of the distribution (Pseudo R<sup>2</sup> = 0.197), and  
377 vertical, dotted lines represent one standard deviation from the mean (sd = 0.07).  
378

379 **References:**

- 380 Anger, C. T., C. Sueper, D. J. Blumentritt, K. McNeill, D. R. Engstrom, and W. A. Arnold. 2013.  
381 Quantification of triclosan, chlorinated triclosan derivatives, and their dioxin  
382 photoproducts in lacustrine sediment cores. *Environ. Sci. Technol.* **47**: 1833–1843.  
383 doi:10.1021/es3045289
- 384 Arnold, S. E. J., J.-H. Dudenhöffer, M. T. Fountain, K. L. James, D. R. Hall, D. I. Farman, F. L.  
385 Wäckers, and P. C. Stevenson. 2021. Bumble bees show an induced preference for  
386 flowers when primed with caffeinated nectar and a target floral odor. *Curr. Biol.* **31**:  
387 4127–4131.e4. doi:10.1016/j.cub.2021.06.068
- 388 Barton, K. 2020. MuMIn: Multi-Model Inference.
- 389 Bendz, D., N. A. Paxéus, T. R. Ginn, and F. J. Loge. 2005. Occurrence and fate of  
390 pharmaceutically active compounds in the environment, a case study: Høje River in  
391 Sweden. *J. Hazard. Mater.* **122**: 195–204. doi:10.1016/j.jhazmat.2005.03.012
- 392 Bernhardt, E. S., E. J. Rosi, and M. O. Gessner. 2017. Synthetic chemicals as agents of global  
393 change. *Front. Ecol. Environ.* **15**: 84–90. doi:10.1002/fee.1450
- 394 Bloom, E. H., E. C. Oeller, R. L. Olsson, M. R. Brousil, R. N. Schaeffer, S. Basu, Z. Fu, and D.  
395 W. Crowder. 2021. Documenting pollinators, floral hosts, and plant–pollinator  
396 interactions in U.S. Pacific Northwest agroecosystems. *Ecology* **n/a**: e3606.  
397 doi:10.1002/ecy.3606
- 398 Brittain, C., and S. G. Potts. 2011. The potential impacts of insecticides on the life-history traits  
399 of bees and the consequences for pollination. *Basic Appl. Ecol.* **12**: 321–331.  
400 doi:10.1016/j.baae.2010.12.004
- 401 Brodin, T., J. Fick, M. Jonsson, and J. Klaminder. 2013. Dilute concentrations of a psychiatric  
402 drug alter behavior of fish from natural populations. *Science* **339**: 814–815.  
403 doi:10.1126/science.1226850
- 404 Brousil, M. R., M. Meyer, B. W. Lee, M. L. Armstrong, E. H. Bloom, and D. Crowder. 2022.  
405 PPCPs in urban pollinators. *Open Sci. Framew.* doi:10.17605/OSF.IO/XYZ8V
- 406 Brydon, D. A., and D. A. Frodsham. 2001. A model-based approach to predicting BOD<sub>5</sub> in  
407 settled sewage. *Water Sci. Technol.* **44**: 9–16. doi:10.2166/wst.2001.0747
- 408 Calcagno, V. 2019. glmulti: Model Selection and Multimodel Inference Made Easy.
- 409 Carter, L. J., M. Williams, and J. B. Sallach. 2021. Uptake and Effects of Pharmaceuticals in the  
410 Soil-Plant-Earthworm System, p. 175–220. *In* S. Pérez Solsona, N. Montemurro, S.  
411 Chiron, and D. Barceló [eds.], *Interaction and Fate of Pharmaceuticals in Soil-Crop*  
412 *Systems: The Impact of Reclaimed Wastewater*. Springer International Publishing.
- 413 Daughton, C. G., and T. A. Ternes. 1999. Pharmaceuticals and personal care products in the  
414 environment: agents of subtle change? *Environ. Health Perspect.* **107**: 907.
- 415 Desaegher, J., A. Ouin, and D. Sheeren. 2022. How far is enough? Prediction of the scale of  
416 effect for wild bees. *Ecography* **n/a**: e05758. doi:10.1111/ecog.05758
- 417 Douglas, M. R., D. B. Sponsler, E. V. Lonsdorf, and C. M. Grozinger. 2020. County-level  
418 analysis reveals a rapidly shifting landscape of insecticide hazard to honey bees (*Apis*  
419 *mellifera*) on US farmland. *Sci. Rep.* **10**: 797. doi:10.1038/s41598-019-57225-w
- 420 Dunnington, D. 2021. ggspatial: Spatial Data Framework for ggplot2.
- 421 Edmondson, W. T. 1970. Phosphorus, nitrogen, and algae in Lake Washington after diversion of  
422 sewage. *Science* **169**: 690–691.
- 423 Feijão, E., R. Cruz de Carvalho, I. A. Duarte, and others. 2020. fluoxetine arrests growth of the  
424 model diatom phaeodactylum tricornutum by increasing oxidative stress and altering



- 425 energetic and lipid metabolism. *Front. Microbiol.* **11**. doi:10.3389/fmicb.2020.01803
- 426 Firke, S. 2020. janitor: Simple Tools for Examining and Cleaning Dirty Data.
- 427 Focazio, M. J., D. W. Kolpin, K. K. Barnes, E. T. Furlong, M. T. Meyer, S. D. Zaugg, L. B.
- 428 Barber, and M. E. Thurman. 2008. A national reconnaissance for pharmaceuticals and
- 429 other organic wastewater contaminants in the United States - II) Untreated drinking water
- 430 sources. *Sci. TOTAL Environ.* **402**: 201–216. doi:10.1016/j.scitotenv.2008.02.021
- 431 Furlong, E. T., S. L. Werner, B. D. Anderson, and J. D. Cahill. 2008. Determination of human-
- 432 health pharmaceuticals in filtered water by chemically modified styrene-divinylbenze
- 433 resin-based solid-phase extraction and high-performance liquid chromatograph/mass
- 434 spectrometry. *Techniques and Methods 5-B5*. Techniques and Methods 5-B5 US
- 435 Geological Survey.
- 436 Gradish, A. E., J. van der Steen, C. D. Scott-Dupree, and others. 2019. Comparison of pesticide
- 437 exposure in honey Bees (Hymenoptera: Apidae) and Bumble Bees (Hymenoptera:
- 438 Apidae): Implications for risk assessments. *Environ. Entomol.* **48**: 12–21.
- 439 doi:10.1093/ee/nvy168
- 440 Grolemond, G., and H. Wickham. 2011. Dates and Times Made Easy with lubridate. *J. Stat.*
- 441 *Softw.* **40**: 1–25.
- 442 Han, W., Z. Yang, L. Di, A. L. Yagci, and S. Han. 2014. Making cropland data layer data
- 443 accessible and actionable in GIS education. *J. Geogr.*
- 444 Hoppe, P. D., E. J. Rosi-Marshall, and H. A. Bechtold. 2012. The antihistamine cimetidine alters
- 445 invertebrate growth and population dynamics in artificial streams. *Freshw. Sci.* **31**: 379–
- 446 388. doi:10.1899/11-089
- 447 Humann-Guillemot, S., Ł. J. Binkowski, L. Jenni, G. Hilke, G. Glauser, and F. Helfenstein.
- 448 2019. A nation-wide survey of neonicotinoid insecticides in agricultural land with
- 449 implications for agri-environment schemes. *J. Appl. Ecol.* **56**: 1502–1514.
- 450 doi:10.1111/1365-2664.13392
- 451 Jr, F. E. H., with contributions from C. Dupont, and many others. 2020. Hmisc: Harrell
- 452 Miscellaneous.
- 453 Karnjanapiboonwong, A., A. N. Morse, J. D. Maul, and T. A. Anderson. 2010. Sorption of
- 454 estrogens, triclosan, and caffeine in a sandy loam and a silt loam soil. *J. Soils Sediments*
- 455 **10**: 1300–1307. doi:10.1007/s11368-010-0223-5
- 456 Kassambara, A. 2019. ggpubr: “ggplot2” Based Publication Ready Plots.
- 457 Katz, S. L., L. R. Izmet’eva, S. E. Hampton, T. Ozersky, K. Shchapov, M. V. Moore, S. V.
- 458 Shimaraeva, and E. A. Silow. 2015. The “Melosira years” of Lake Baikal: Winter
- 459 environmental conditions at ice onset predict under-ice algal blooms in spring: Resolving
- 460 Melosira years on Lake Baikal. *Limnol. Oceanogr.* **60**: 1950–1964.
- 461 doi:10.1002/lno.10143
- 462 Kleijn, D., R. Winfree, I. Bartomeus, and others. 2015. Delivery of crop pollination services is an
- 463 insufficient argument for wild pollinator conservation. *Nat. Commun.* **6**: 7414.
- 464 doi:10.1038/ncomms8414
- 465 Kolpin, D. W., E. T. Furlong, M. T. Meyer, E. M. Thurman, S. D. Zaugg, L. B. Barber, and H. T.
- 466 Buxton. 2002. Pharmaceuticals, hormones, and other organic wastewater contaminants in
- 467 U.S. Streams, 1999–2000: A national reconnaissance. *Environ. Sci. Technol.* **36**: 1202–
- 468 1211. doi:10.1021/es011055j
- 469 Lagesson, A., J. Fahlman, T. Brodin, J. Fick, M. Jonsson, P. Byström, and J. Klaminder. 2016.
- 470 Bioaccumulation of five pharmaceuticals at multiple trophic levels in an aquatic food

- 471 web - Insights from a field experiment. *Sci. Total Environ.* **568**: 208–215.  
472 doi:10.1016/j.scitotenv.2016.05.206
- 473 Lee, S. S., A. M. Paspalof, D. D. Snow, E. K. Richmond, E. J. Rosi-Marshall, and J. J. Kelly.  
474 2016. Occurrence and potential biological effects of amphetamine on stream  
475 communities. *Environ. Sci. Technol.* **50**: 9727–9735. doi:10.1021/acs.est.6b03717
- 476 Lemon, J. 2006. Plotrix: a package in the red light district of R. *R-News* **6**: 8–12.
- 477 Leonhardt, S., and N. Blüthgen. 2012. The same, but different: pollen foraging in honeybee and  
478 bumblebee colonies. *Apidologie* **43**: 449–464. doi:10.1007/s13592-011-0112-y
- 479 Lüdecke, D. 2018. ggeffects: Tidy Data Frames of Marginal Effects from Regression Models. *J.*  
480 *Open Source Softw.* **3**: 772. doi:10.21105/joss.00772
- 481 Meador, J. P., A. Yeh, G. Young, and E. P. Gallagher. 2016. Contaminants of emerging concern  
482 in a large temperate estuary. *Environ. Pollut.* **213**: 254–267.  
483 doi:10.1016/j.envpol.2016.01.088
- 484 Meyer, M. F., T. Ozersky, K. H. Woo, and others. 2022. Effects of spatially heterogeneous  
485 lakeside development on nearshore biotic communities in a large, deep, oligotrophic lake.  
486 *Limnol. Oceanogr.* **67**: 2649–2664. doi:10.1002/lno.12228
- 487 Meyer, M. F., S. M. Powers, and S. E. Hampton. 2019. An evidence synthesis of  
488 pharmaceuticals and personal care products (PPCPs) in the environment: imbalances  
489 among compounds, sewage treatment techniques, and ecosystem types. *Environ. Sci.*  
490 *Technol.* **53**: 12961–12973.
- 491 Pebesma, E. 2018. Simple Features for R: Standardized Support for Spatial Vector Data. *R J.* **10**:  
492 439–446. doi:10.32614/RJ-2018-009
- 493 Potts, S. G., J. C. Biesmeijer, C. Kremen, P. Neumann, O. Schweiger, and W. E. Kunin. 2010.  
494 Global pollinator declines: trends, impacts and drivers. *Trends Ecol. Evol.* **25**: 345–353.  
495 doi:10.1016/j.tree.2010.01.007
- 496 R Core Team. 2022. R: A Language and Environment for Statistical Computing, R Foundation  
497 for Statistical Computing.
- 498 del Rey, Z. R., E. F. Granek, and B. A. Buckley. 2011. Expression of HSP70 in *Mytilus*  
499 *californianus* following exposure to caffeine. *Ecotoxicology* **20**: 855–861.  
500 doi:10.1007/s10646-011-0649-6
- 501 Rheubert, J. L., M. F. Meyer, R. M. Strobel, M. A. Pasternak, and R. A. Charvat. 2020.  
502 Predicting antibacterial activity from snake venom proteomes. *PloS One* **15**: e0226807.
- 503 Richmond, E. K., M. R. Grace, J. J. Kelly, A. J. Reisinger, E. J. Rosi, and D. M. Walters. 2017.  
504 Pharmaceuticals and personal care products (PPCPs) are ecological disrupting  
505 compounds (EcoDC). *Elem Sci Anth* **5**: 66. doi:10.1525/elementa.252
- 506 Richmond, E. K., E. J. Rosi, A. J. Reisinger, B. R. Hanrahan, R. M. Thompson, and M. R. Grace.  
507 2019. Influences of the antidepressant fluoxetine on stream ecosystem function and  
508 aquatic insect emergence at environmentally realistic concentrations. *J. Freshw. Ecol.* **34**:  
509 513–531. doi:10.1080/02705060.2019.1629546
- 510 Richmond, E. K., E. J. Rosi, D. M. Walters, J. Fick, S. K. Hamilton, T. Brodin, A. Sundelin, and  
511 M. R. Grace. 2018. A diverse suite of pharmaceuticals contaminates stream and riparian  
512 food webs. *Nat. Commun.* **9**: 4491. doi:10.1038/s41467-018-06822-w
- 513 Shahriar, A., J. Tan, P. Sharma, D. Hanigan, P. Verburg, K. Pagilla, and Y. Yang. 2021.  
514 Modeling the fate and human health impacts of pharmaceuticals and personal care  
515 products in reclaimed wastewater irrigation for agriculture. *Environ. Pollut. Barking*  
516 *Essex* **1987** **276**: 116532. doi:10.1016/j.envpol.2021.116532



- 517 Slowikowski, K. 2019. ggrepel: Automatically Position Non-Overlapping Text Labels with  
518 “ggplot2.”
- 519 Thompson, H. M., and L. V. Hunt. 1999. Extrapolating from honeybees to bumblebees in  
520 pesticide risk assessment. *Ecotoxicology* **8**: 147–166. doi:10.1023/A:1026444029579
- 521 Tong, Y., M. Wang, J. Peñuelas, and others. 2020. Improvement in municipal wastewater  
522 treatment alters lake nitrogen to phosphorus ratios in populated regions. *Proc. Natl. Acad.*  
523 *Sci.* **117**: 11566–11572. doi:10.1073/pnas.1920759117
- 524 Walker, K. 2021. tigris: Load Census TIGER/Line Shapefiles.
- 525 Wei, T., and V. Simko. 2017. R package “corrplot”: Visualization of a Correlation Matrix.
- 526 Wickham, H., M. Averick, J. Bryan, and others. 2019. Welcome to the tidyverse. *J. Open Source*  
527 *Softw.* **4**: 1686. doi:10.21105/joss.01686
- 528 Wickham, H., and J. Bryan. 2019. readxl: Read Excel Files.
- 529 Wilke, C. O. 2019. cowplot: Streamlined Plot Theme and Plot Annotations for “ggplot2.”
- 530 Wilkinson, J. L., A. B. A. Boxall, D. W. Kolpin, and others. 2022. Pharmaceutical pollution of  
531 the world’s rivers. *Proc. Natl. Acad. Sci.* **119**: e2113947119.  
532 doi:10.1073/pnas.2113947119
- 533 Wright, G. A., D. D. Baker, M. J. Palmer, D. Stabler, J. A. Mustard, E. F. Power, A. M. Borland,  
534 and P. C. Stevenson. 2013. Caffeine in floral nectar enhances a pollinator’s memory of  
535 reward. *Science* **339**: 1202–1204. doi:10.1126/science.1228806
